# Supplementary material
Source: PubMed Central journal article supplement (PMC2865575)

Figure S-1

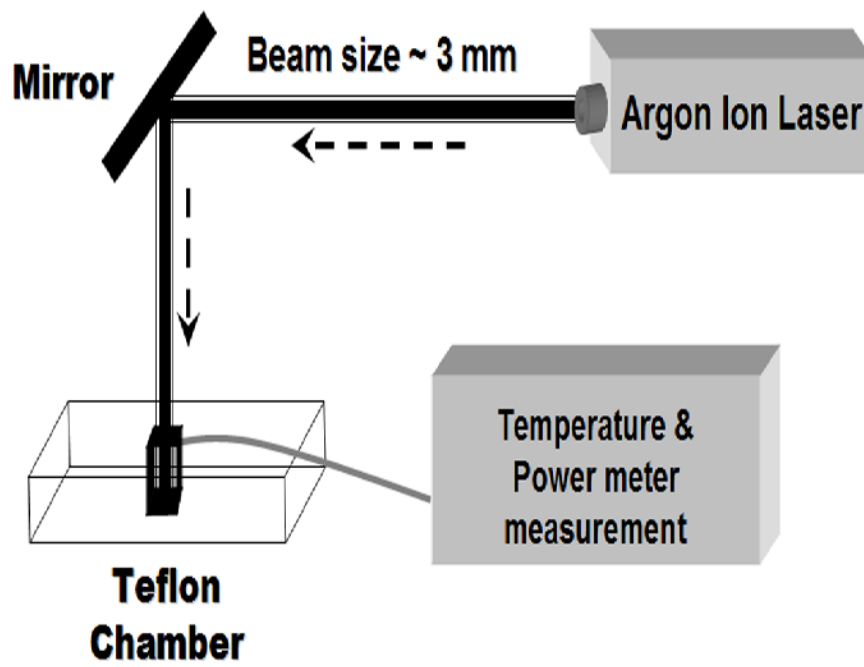

Figure S-2

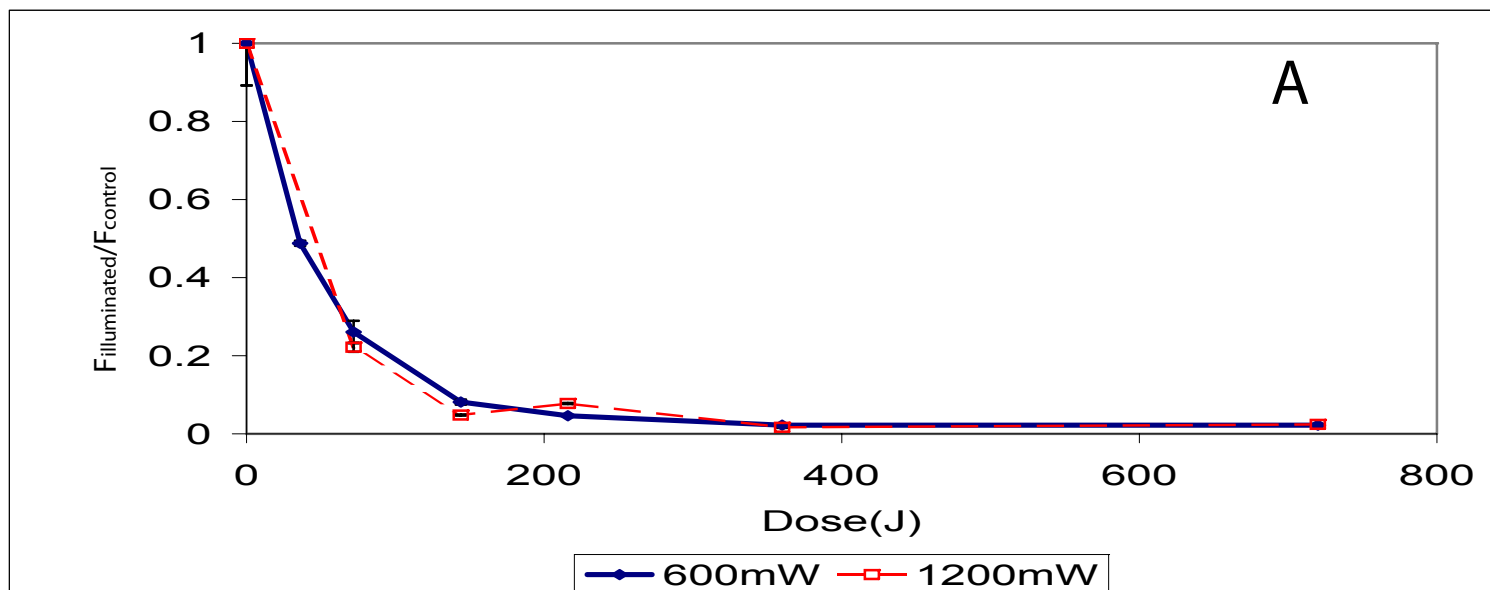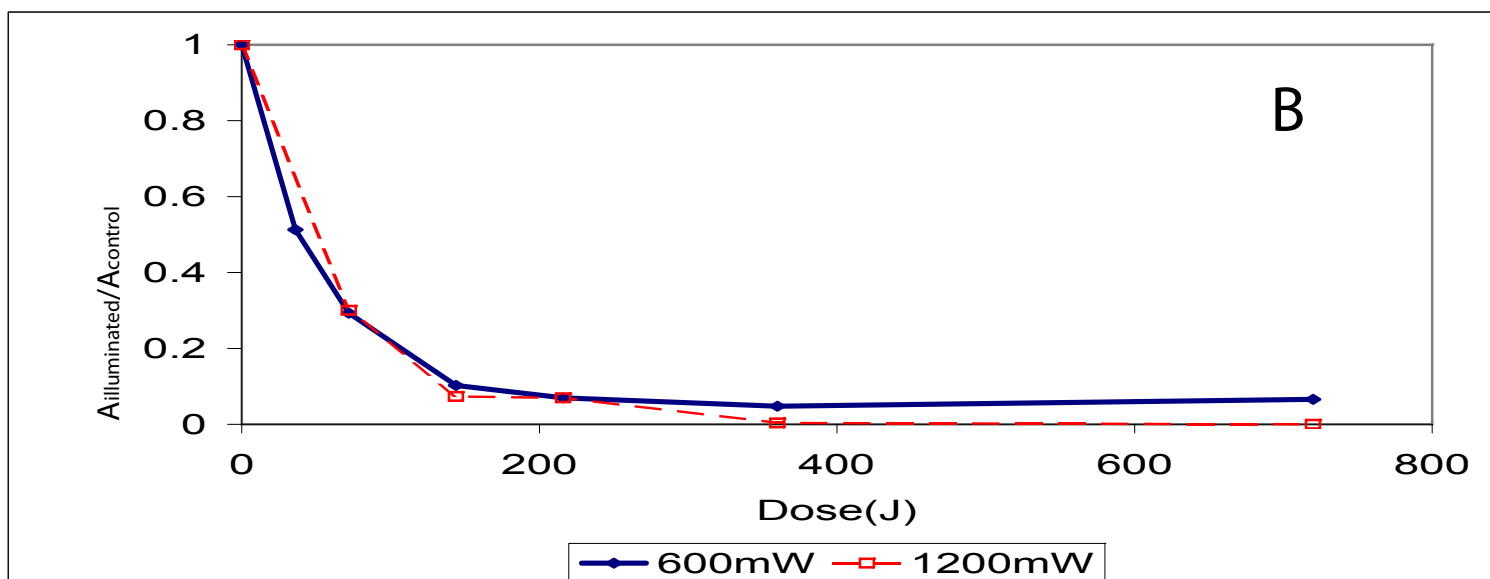

Figure S-3

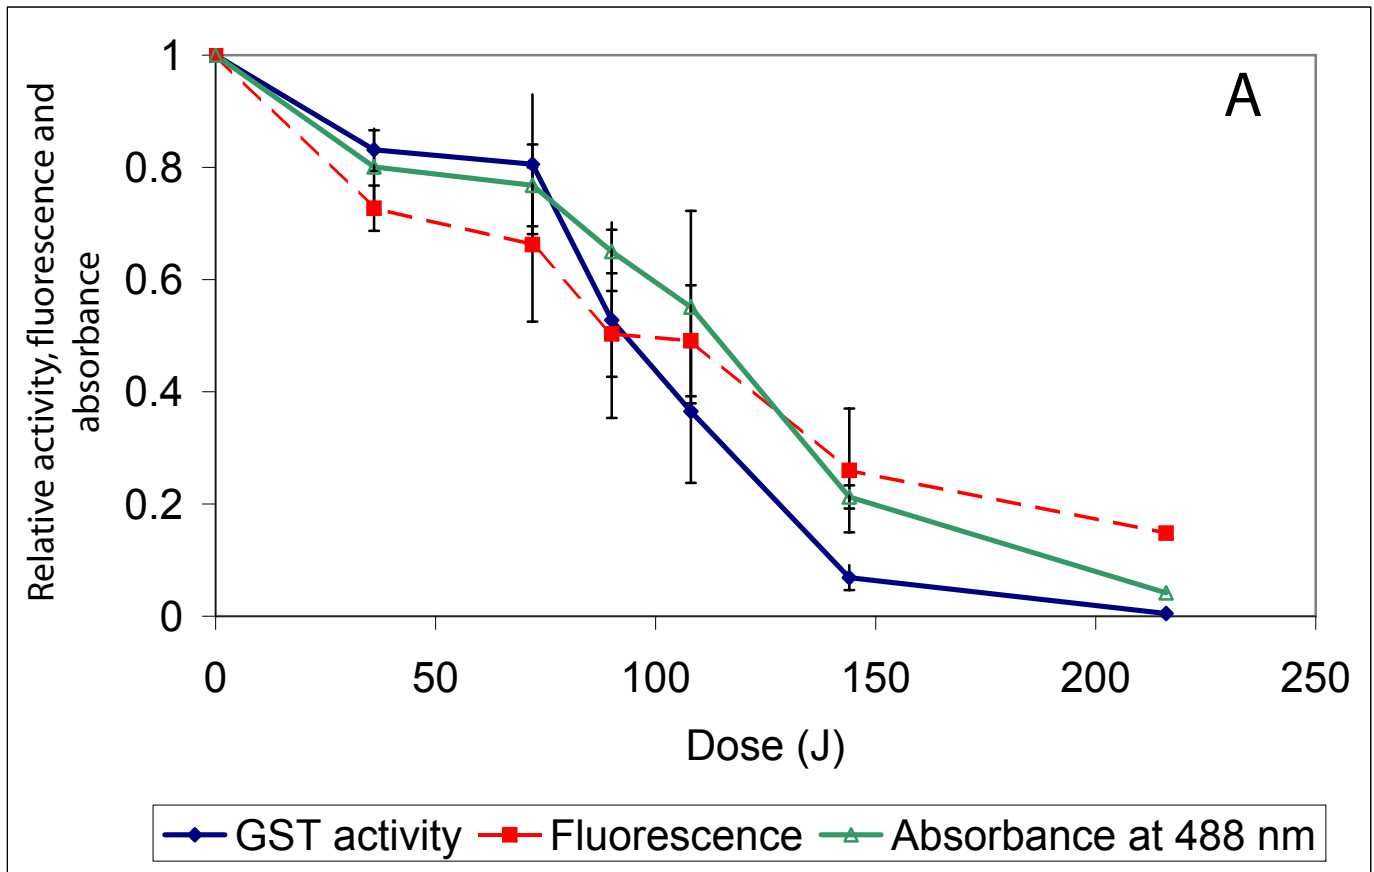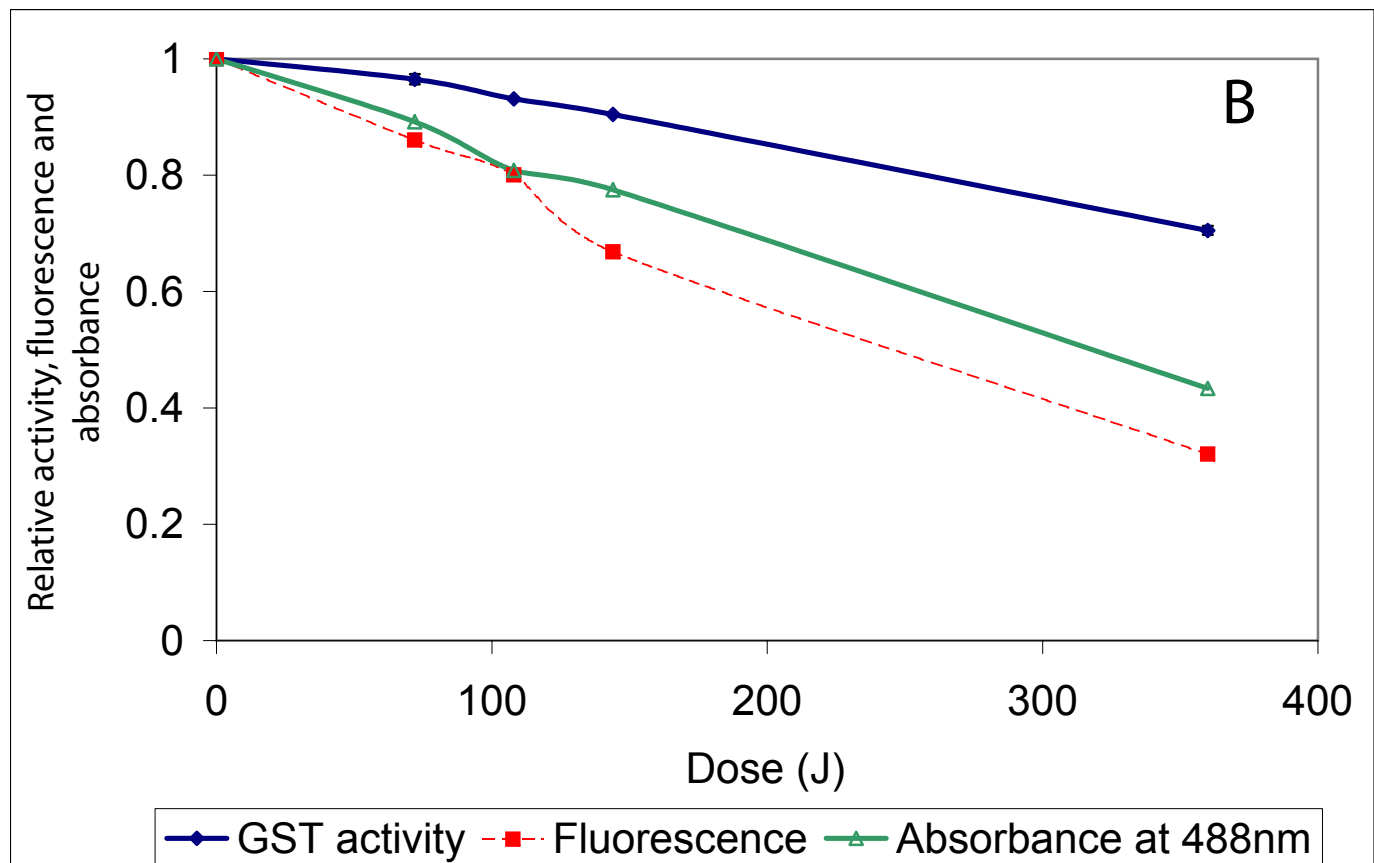

Figure S-4

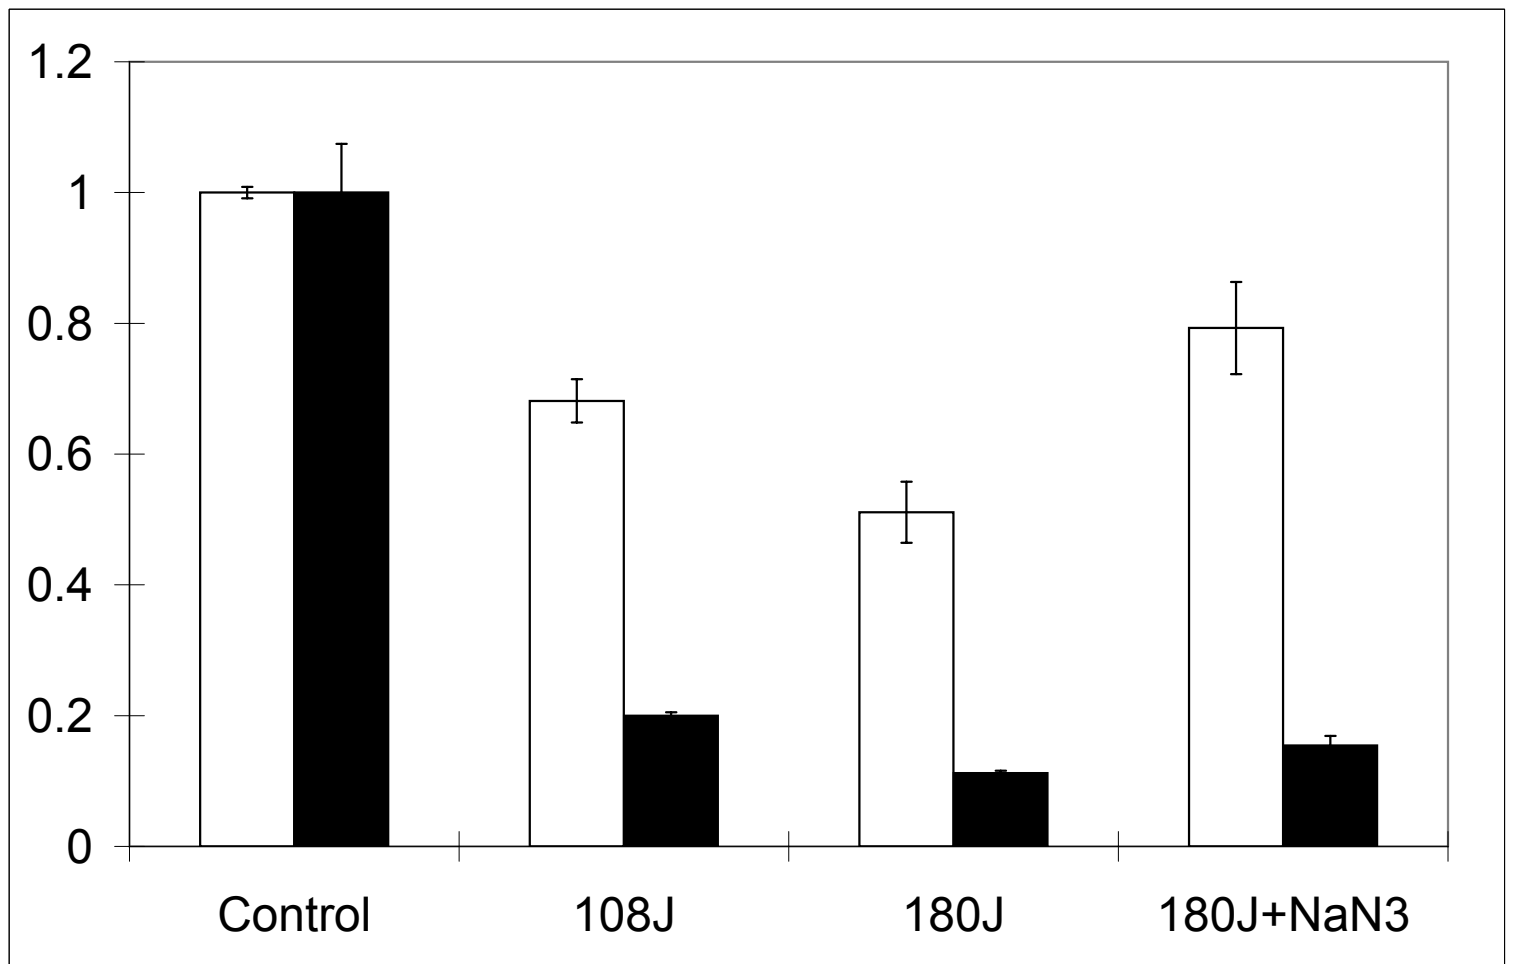

Figure S-5

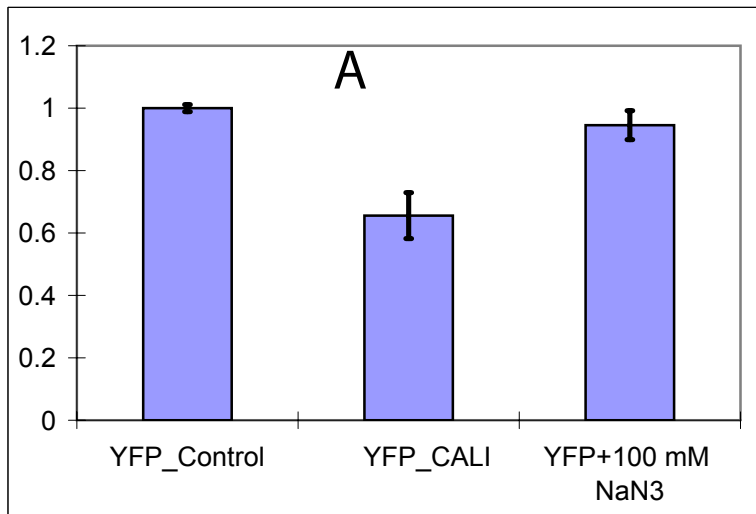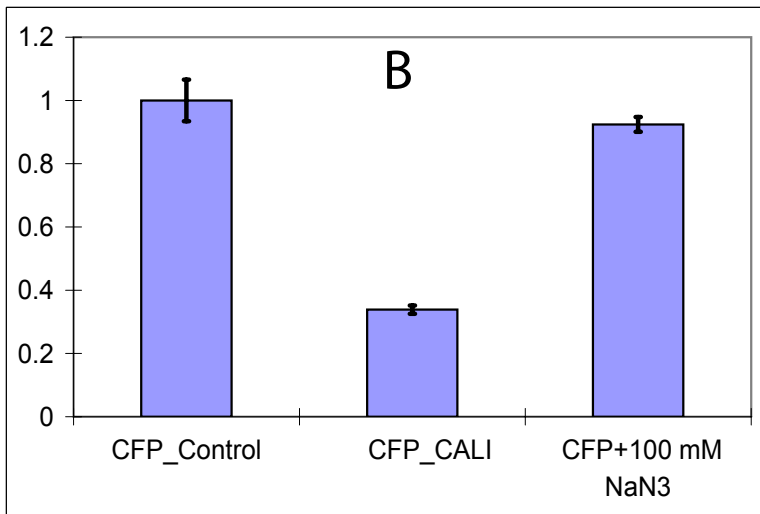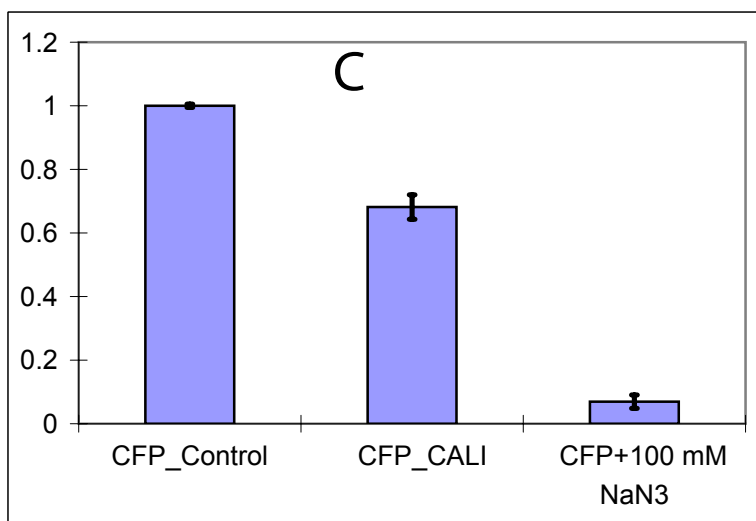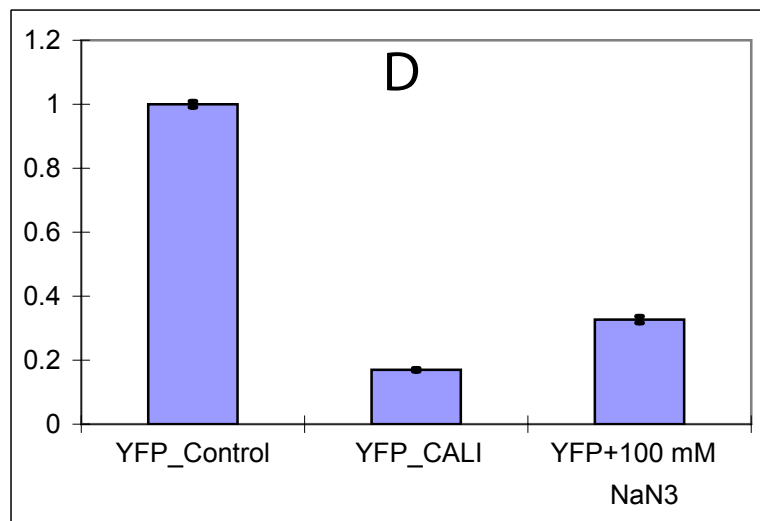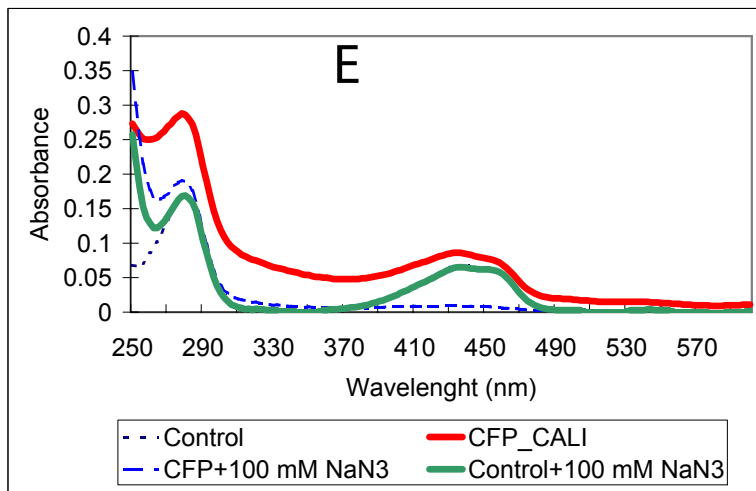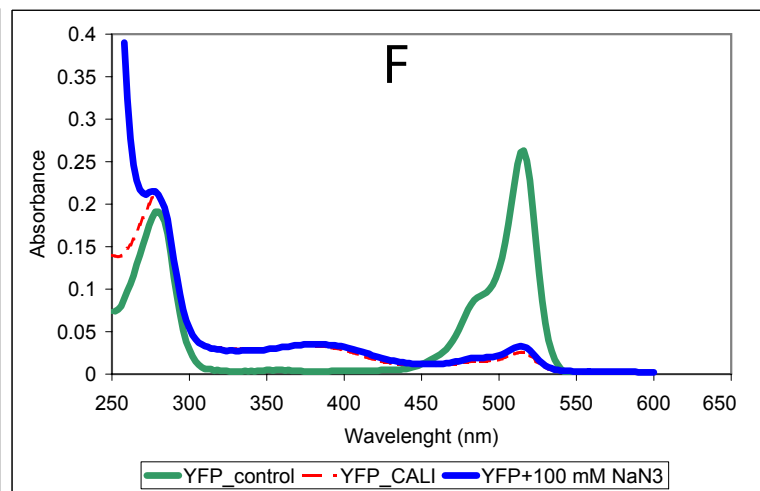

Figure S-6

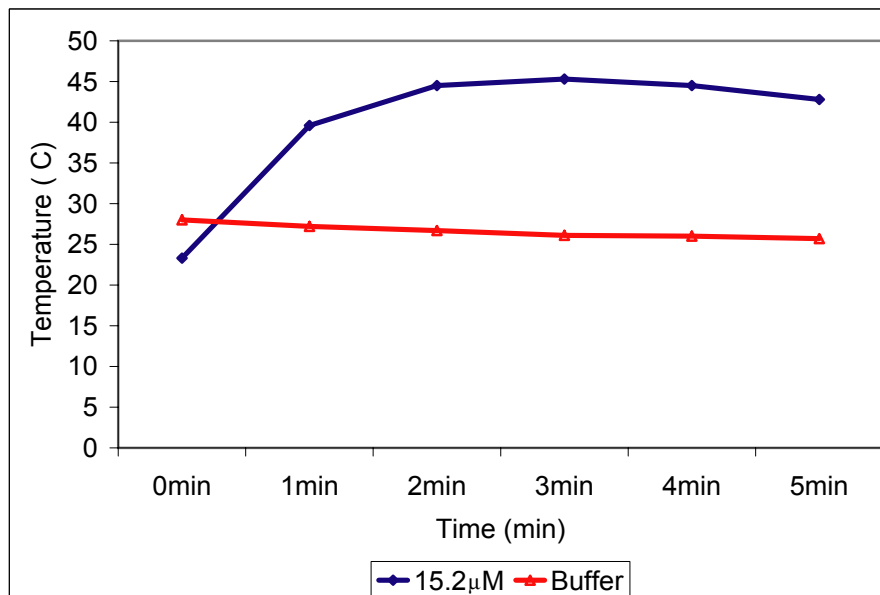

A

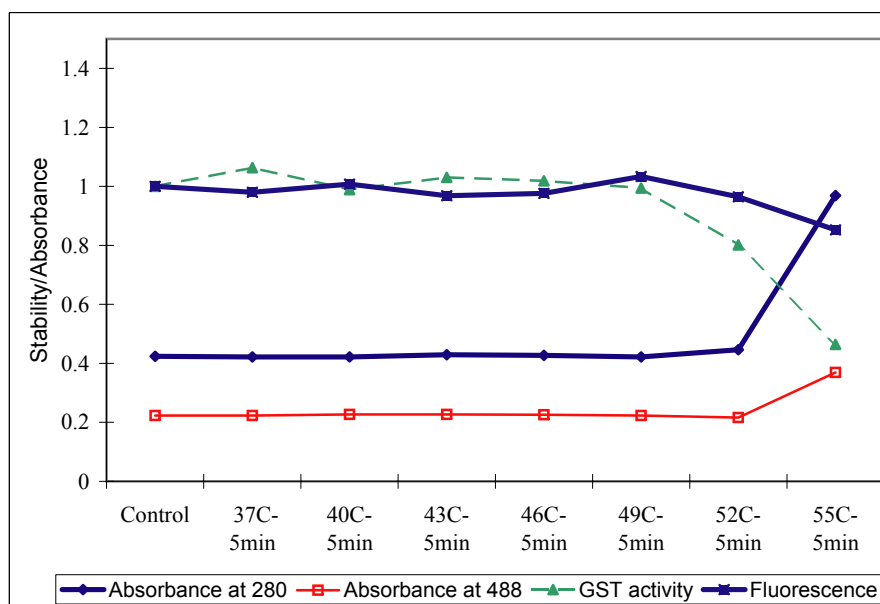

B

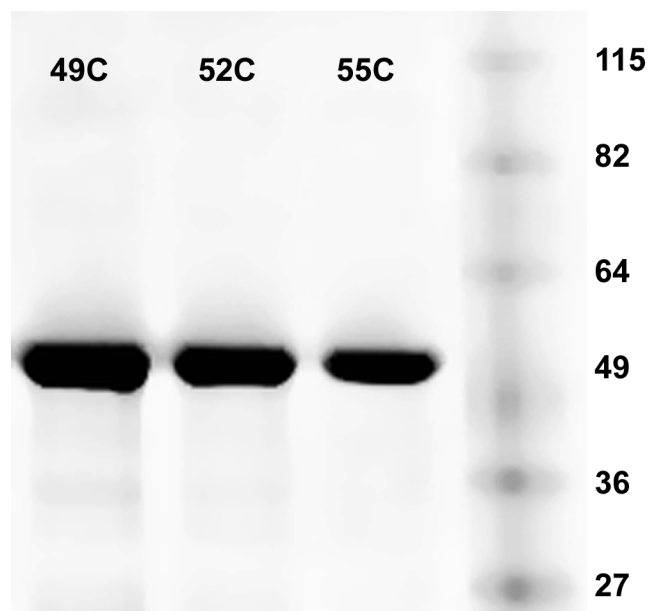

C

Supplement: NIHMS91940-supplement-2_si_002.pdf [file NIHMS91940-supplement-2_si_002.pdf]
